# Supplementary material
Source: publisher figshare collection journal article supplement (https://gsajournals.figshare.com/ndownloader/files/20183216)
Supplement: Supplementary file 1 [file 20183216]

## Sheet: Sheet1
	LG3			LG3			LG3			LG3				LG3				LG8			LG8			LG8			LG8			LG8			LG12			LG12			LG12
	TT	CT		CC	TC		CC	GC		TT	AT	AA		GG	AG			GG	AG		GG	AG		GG	AG		GG	CG		TT	AT		TT	CT		CC	AC		GG	CG
	5.11111	7.9		4	7.9		4	7.9		5.11111	4	7.9		7.9	4			7.9	5.69231		7.9	5.69231		7.9	5.69231		7.9	5.11111		5.69231	7.9		5.11111	7.9		5.11111	7.9		5.11111	5.69231
	1.92857	5.69231		1.92857	3.16667		1.92857	5.69231		3	1.92857	5.69231		3.16667	1.92857			3.16667	5.11111		3.16667	5.11111		4.2	5.11111		3.16667	1.92857		5.11111	1.92857		4.2	5.69231		4.2	5.69231		4.2	4
	3	3.8		5.5	5.69231		5.5	4.2		2.66667	3.78571	4.2		5.69231	5.5			4.2	1.92857		4.2	1.92857		3.78571	1.92857		5.69231	3.8		4.2	3.8		3.78571	1.92857		3.78571	1.92857		3.78571	1.92857
	2.66667	4.58333		4.09091	5.11111		3.63636	3.78571		3.09091	1.83333	3.8		5.11111	4.09091			4	1.83333		4	1.83333		5.5	3.8		4.2	2.58333		4	2.58333		3	4.09091		3	4.09091		3	5.5
	5.88889	4.6		3	4.2		4.58333	3.8		1.85714	1.15385	4.58333		4.2	3			3.78571	3.8		3.78571	3.8		4.09091	2.58333		4	0.7		3.78571	3.16667		3.8	2.58333		3.8	2.58333		3.8	2.58333
	3.09091	3.84615		0.7	3.78571		2.61538	4.36364		2.18182	2.58333	4.6		3.78571	0.7			5.5	2.58333		5.5	2.58333		3	4.36364		3.78571	4.36364		5.5	1.33333		2.72727	5.88889		2.72727	5.88889		4.36364	3.16667
	2.61538	1.86667		2.66667	3.8		2.18182	4.6		4.375	3.16667	2.61538		3.8	2.66667			4.09091	3.16667		4.09091	3.16667		2.72727	2.66667		5.5	2.66667		4.09091	4.36364		4.36364	4.58333		4.36364	4.58333		2.66667	5.88889
	3.1	3.26667		5.88889	2.58333		1.30769	3.84615		3.83333	2.72727	6.81818		2.58333	5.88889			3	0.7		3	0.7		5.88889	3.09091		3	3.09091		1.83333	2.66667		2.66667	4.6		2.66667	4.6		3.09091	4.58333
	3.5	4.41667		3.63636	2.72727		3.83333	1.86667		5.07692	4.36364	3.83333		2.72727	3.63636			2.72727	4.36364		2.72727	4.36364		3.63636	2.58333		3.27273	3.84615		3	3.09091		3.63636	1.86667		3.63636	1.86667		3.26667	4.6
	2.38462	2.22222		2.18182	4.36364		2.75	6.81818		2.38462	5.88889	5.11111		4.36364	2.18182			5.88889	2.66667		5.88889	2.66667		4.58333	3.84615		5.88889	1.86667		2.72727	2.58333		3.09091	2.61538		3.09091	2.61538		2.18182	2.58333
	1	6.81818		1.30769	4.58333		3.5	3.83333		1	3.63636	5.2		4.58333	3.1			3.63636	3.09091		3.63636	3.09091		4.6	1.86667		3.63636	1.85714		5.88889	3.84615		3.84615	4.41667		3.84615	4.41667		3.1	1.86667
	1.875	2.75		4.375	3.09091		5.07692	5.11111		3.08333	2.58333	7.41667		3.09091	1.30769			4.58333	2.58333		4.58333	2.58333		3.26667	2.61538		4.58333	4.41667		3.63636	1.86667		2.18182	3.83333		2.18182	3.83333		2.22222	2.61538
	2.22222	3.83333		3.83333	4.6		2.38462	1.53846		3.45455	3.84615			4.6	4.375			4.6	3.84615		4.6	3.84615		2.18182	4.41667		4.6	2.18182		4.58333	1.85714		3.1	2.75		3.1	2.75		1.30769	4.41667
	3.8	4.9		3.5	3.84615		1	5.2			1.86667			3.84615	3.83333			3.26667	1.86667		3.26667	1.86667		6.81818	3.1		3.26667	3.1		4.6	2.61538		3.83333	5.07692		3.83333	5.07692		4.375	6.81818
	3.08333	5.11111		5.07692	1.86667		1.875	7.41667			3.26667			1.86667	3.5			2.18182	1.85714		2.18182	1.85714		4.375	1.30769		2.61538	2.22222		3.26667	4.41667		3.5	4.9		3.5	4.9		3.83333	3.83333
	3	3.11111		2.38462	3.26667		2.22222				4.41667			3.26667	5.07692			2.54545	2.61538		2.54545	2.61538		3.83333	2.75		2.54545	1.30769		2.54545	2.18182		2.38462	2.22222		2.38462	2.22222		3.5	2.75
	3.45455	5.2		1	4.41667		3.8				2.54545			4.41667	2.38462			6.81818	4.41667		6.81818	4.41667		5.07692	3.5		6.81818	3.83333		6.81818	3.1		1	3.08333		1	3.08333		2.38462	5.07692
	3	7.41667		3.125	2.54545		3.08333				3.1			2.54545	1			4.375	3.1		4.375	3.1		2.38462	1		4.375	2.75		4.375	2.22222		1.875	5.11111		1.875	5.11111		1	4.9
	3.125			1.875	2.22222		3				2.22222			2.22222	3.125			3.83333	2.22222		3.83333	2.22222		4.9	1.875		3.83333	3.5		3.83333	1.30769		3.8	3		3.8	3		3.125	2.22222
				2.22222	6.81818		3				2.75			6.81818	1.875			5.07692	1.30769		5.07692	1.30769		2.22222	3		5.07692	1		5.07692	3.83333		3.11111			3.11111			1.875	3.08333
				3.8	2.75						3.5			2.75	2.22222			2.38462	3.83333		2.38462	3.83333		3.8	3		2.38462	1.53846		2.38462	2.75		3			3			3.8	5.11111
				3.08333	3.83333						1.875			3.83333	3.8			3.125	2.75		3.125	2.75		3.08333	3.125		1.875	3		3.125	3.5		5.2			5.2			3.11111	3
				3	4.9						4.9			4.9	3.08333			4.9	3.5		4.9	3.5		5.11111			4.9	3		1.875	1		7.41667			7.41667			5.2
				3	5.11111						2.22222			5.11111	3			2.22222	1		2.22222	1		3.11111			2.22222	3.125		4.9	3								7.41667
				3.125	3.11111						3.8			3.11111	3			3.8	1.875		3.8	1.875		5.2			3.8			2.22222	3								3.125
					5.2						3.11111			5.2	3.125			3.08333	1.53846		3.08333	1.53846		3.45455			3.08333			3.8	3.125
					7.41667						1.53846			7.41667				5.11111	3		5.11111	3		7.41667			5.11111			3.08333
											3							3.11111	3		3.11111	3					3.11111			5.11111
											3							5.2	3.125		5.2	3.125					5.2			3.11111
											3.125							3.45455			3.45455						3.45455			5.2
																		7.41667			7.41667						7.41667			3.45455
																														7.41667
